# Supplementary material for: Pituitary dysfunction induced by immune checkpoint inhibitors is associated with better overall survival in both malignant melanoma and non-small cell lung carcinoma: a prospective study
Source: PubMed Central journal article supplement — J Immunother Cancer. 2020 Jun 30;8(2):e000779. doi: 10.1136/jitc-2020-000779 (PMC7328763; doi:10.1136/jitc-2020-000779), 2020-06-30
Supplement: jitc-2020-000779supp001.pdf [file jitc-2020-000779supp001.pdf]

### 1 Supplementary Table S1. Characteristics of patients diagnosed with pituitary-irAE

| Case   | Malignancy | Drug | Age, y | Sex | Days to onset | Symptoms at the onset | Hormone deficiency | MRI findings At the onset |
|--------|------------|------|--------|-----|---------------|-----------------------|--------------------|---------------------------|
| Ipi001 | MM         | Ipi  | 69     | M   | 62            | HA, fatigue, Hypo Na  | C, T, G            | Enlarged                  |
| Ipi005 | MM         | Ipi  | 48     | M   | 26            | HA, fatigue, Hypo Na  | C, G               | Enlarged                  |
| Ipi011 | MM         | Ipi  | 59     | M   | 79            | HA                    | C, T, G, S         | Enlarged                  |
| Ipi018 | MM         | Ipi  | 69     | F   | 156           | HA, fatigue           | C                  | Normal                    |
| Ipi008 | MM         | Ipi  | 46     | M   | 106           | Fatigue               | C                  | Normal                    |
| Ipi024 | MM         | Ipi  | 71     | F   | 25            | Fatigue, Hypo Na      | C                  | Normal                    |
| Niv033 | MM         | Niv  | 50     | F   | 171           | HA, fatigue           | C                  | Normal                    |
| Niv060 | NSCLC      | Niv  | 72     | M   | 246           | Fatigue, Hypo Na      | C                  | Normal                    |
| Niv096 | MM         | Niv  | 66     | M   | 128           | Fatigue               | C                  | Normal                    |
| Pem007 | MM         | Pem  | 78     | F   | 469           | Fatigue, Hypo Na      | C                  | Normal                    |
| Pem021 | NSCLC      | Pem  | 79     | M   | 216           | Fatigue               | C                  | Normal                    |
| Pem035 | NSCLC      | Pem  | 64     | M   | 114           | Fatigue               | C                  | Normal                    |
| Pem037 | NSCLC      | Pem  | 70     | F   | 149           | Fatigue, Hypo Na      | C                  | Normal                    |
| Pem092 | MM         | Pem  | 78     | M   | 84            | Fatigue               | C                  | Normal                    |
| Pem098 | MM         | Pem  | 62     | M   | 112           | Fatigue               | C                  | Normal                    |
| Pem110 | MM         | Pem  | 60     | M   | 127           | Fatigue               | C                  | Normal                    |

2 **Abbreviations:** irAE, immune-related adverse event; MM, malignant melanoma; NSCLC, non-small cell

3 lung carcinoma; Ipi, ipilimumab; Niv, nivolumab; Pem, pembrolizumab; M, male; F, female; HA,

4 headache; Hypo Na, hyponatremia (serum Na < 135); C, corticotroph deficiency; T, thyrotroph

5 deficiency; G, gonadotroph deficiency; S, somatotroph deficiency

6 **Supplementary Table S2. Corticotropin-releasing hormone loading test in patients who developed**7 **pituitary-irAE**

8

| min.   | ACTH (pg/mL) |      |      |      |      | Cortisol (µg/dL) |     |     |     |     |
|--------|--------------|------|------|------|------|------------------|-----|-----|-----|-----|
|        | 0            | 30   | 60   | 90   | 120  | 0                | 30  | 60  | 90  | 120 |
| Ipi001 | 1.3          | 1.1  | 1.5  | 1.6  | 1.2  | 1                | 0.8 | 0.8 | 0.6 | 0.6 |
| Ipi005 | 1            | 1.2  | 1.3  | 1.3  | 1.5  | 0.2              | 0.2 | 0.2 | 0.2 | 0.2 |
| Ipi011 | 3.1          | 3.2  | 4.3  | 3.6  | 2.8  | 0.5              | 0.5 | 0.5 | 0.5 | 0.5 |
| Ipi018 | 1.5          | 2.7  | 2.6  | 2.2  | 2.6  | 0.3              | 0.3 | 0.3 | 0.2 | 0.2 |
| Ipi008 | 1            | 1    | 1    | 1    | 1    | 0.1              | 0.1 | 0.1 | 0.1 | 0.1 |
| Ipi024 | 1.1          | 1.1  | 1.4  | 1.3  | 1.3  | 5.1              | 4.4 | 3.9 | 3.6 | 3.2 |
| Niv033 | 3.1          | 3.5  | 3.6  | 2.4  | 3.1  | 0.3              | 0.3 | 0.3 | 0.2 | 0.3 |
| Niv060 | 22.8         | 29   | 29.3 | 25.9 | 24.7 | 1.6              | 2.2 | 2.9 | 2.3 | 1.9 |
| Niv096 | 1.9          | 2    | 1.9  | 1.8  | 2    | 0.3              | 0.2 | 0.3 | 0.2 | 0.2 |
| Pem007 | 1            | 2.3  | 2.8  | 2.9  | 3.7  | 7.5              | 6.7 | 6.2 | 5.9 | 5.7 |
| Pem021 | 8.1          | 10.5 | 9.5  | 8.5  | 9    | 1.6              | 1.6 | 1.6 | 1.5 | 1.4 |
| Pem035 | 2.2          | 2.8  | 2.4  | 2.3  | 2.6  | 0.7              | 0.6 | 0.5 | 0.4 | 0.4 |
| Pem037 | 2.4          | 3.8  | 5.4  | 4.5  | 4.2  | 0.5              | 0.4 | 0.4 | 0.4 | 0.3 |
| Pem092 | 9.7          | 8    | 8.7  | 3.8  | 8.2  | 1.1              | 1   | 0.9 | 1   | 0.9 |
| Pem098 | 7.8          | 8.9  | 4    | 2.4  | 5.2  | 0.7              | 0.8 | 0.7 | 0.7 | 0.7 |
| Pem110 | 2.4          | 3.6  | 3.6  | 2.7  | 2.5  | 0.4              | 0.6 | 0.7 | 0.7 | 0.6 |

9 **Abbreviations:** irAE, immune-related adverse event; ACTH, adrenocorticotropic hormone; Ipi,

10 ipilimumab; Niv, nivolumab; Pem, pembrolizumab

11 **Supplementary Table S3. Median OS in NSCLC and MM patients who did and did not develop**12 **irAEs**

|                | NSCLC ( <i>n</i> = 108) |                    |                | MM ( <i>n</i> = 52) |                    |                |
|----------------|-------------------------|--------------------|----------------|---------------------|--------------------|----------------|
|                | With irAE               | Without irAE       | <i>P</i> value | With irAE           | Without irAE       | <i>P</i> value |
| All irAEs      | Not reached             | 378<br>(220 - 536) | 0.004          | 534<br>(245 - 823)  | 189<br>(52 - 326)  | 0.035          |
| Endocrine-irAE | Not reached             | 401<br>(240 - 562) | 0.004          | 649<br>(367 - 931)  | 342<br>(131 - 553) | 0.107          |
| Pituitary-irAE | Not reached             | 441<br>(NC)        | 0.036          | 885<br>(434 - 1336) | 298<br>(84 - 512)  | 0.038          |
| Thyroid-irAE   | Not reached             | 441<br>(317 - 565) | 0.048          | 427<br>(0 - 871)    | 393<br>(219 - 567) | 0.875          |
| Non-Endo-irAE  | 585<br>(321 - 849)      | 441<br>(297 - 585) | 0.247          | 534<br>(268 - 800)  | 241<br>(0 - 523)   | 0.268          |
| Lung-irAE      | 488<br>(167 - 809)      | 474<br>(334 - 614) | 0.710          | 1259<br>(0 - 2655)  | 393<br>(237 - 549) | 0.202          |
| Skin-irAE      | 669<br>(438 - 900)      | 441<br>(310 - 572) | 0.550          | 649<br>(NC)         | 379<br>(252 - 506) | 0.560          |
| GI-irAE        | Not reached             | 481<br>(351 - 597) | 0.731          | 491<br>(152 - 830)  | 393<br>(174 - 612) | 0.581          |

13 Data are reported as median (95% CI, days). NC = not calculated (too few patients to calculate reliably).

14 **Abbreviations:** OS, overall survival; NSCLC, non-small cell lung carcinoma; MM, malignant

15 melanoma; irAEs, immune related adverse events; Non-Endo-irAE, any irAE other than endocrine-irAE;

16 GI-irAE, gastrointestinal irAE

17 **Supplementary Table S4. Clinical characteristics of NSCLC patients included in the Kaplan-Meier**18 **analysis according to development of pituitary-irAE**

| Characteristics          |               | Total<br><i>n</i> = 108 | With<br>pituitary-irAE<br><i>n</i> = 4 | Without<br>pituitary-irAE<br><i>n</i> = 104 | <i>P</i> value |
|--------------------------|---------------|-------------------------|----------------------------------------|---------------------------------------------|----------------|
| Age, y                   |               | 67 ± 10                 | 71 ± 6                                 | 67 ± 11                                     | 0.396          |
| Sex                      | Female        | 29 (26.9)               | 1 (25.0)                               | 28 (26.9)                                   | 1.000          |
|                          | Male          | 79 (73.1)               | 3 (75.0)                               | 76 (73.1)                                   |                |
| Drugs                    | Niv           | 57 (52.8)               | 1 (25.0)                               | 56 (53.8)                                   | 0.342          |
|                          | Pem           | 51 (47.2)               | 3 (75.0)                               | 48 (46.2)                                   | 0.342          |
|                          | Ate           | 9 (8.3)                 | 1 (25.0)                               | 8 (7.7)                                     | 0.298          |
| History of prior ICI use |               | 0                       | 0                                      | 0                                           | 1.000          |
| Treatment lines          | First line    | 32 (29.6)               | 1 (25.0)                               | 31 (29.8)                                   | 1.000          |
|                          | ≥ Second line | 76 (70.4)               | 3 (75.0)                               | 73 (70.2)                                   |                |

19 Data are mean ± SD or *n* (%).20 **Abbreviations:** NSCLC, non-small cell lung carcinoma; irAE, immune-related adverse event; Niv,

21 nivolumab; Pem, pembrolizumab; Ate, atezolizumab; ICIs, immune checkpoint inhibitors

22 **Supplementary Table S5. Clinical characteristics of MM patients included in the Kaplan-Meier**  
 23 **analysis according to development of pituitary-irAE**

| Characteristics          |            | Total<br><i>n</i> = 52 | With<br>pituitary-irAE<br><i>n</i> = 9 | Without<br>pituitary-irAE<br><i>n</i> = 43 | <i>P</i> value |
|--------------------------|------------|------------------------|----------------------------------------|--------------------------------------------|----------------|
| Age, y                   |            | 70 ± 12                | 62 ± 11                                | 72 ± 11                                    | 0.011          |
| Sex                      | Female     | 20 (38.5)              | 4 (44.4)                               | 16 (37.2)                                  | 0.719          |
|                          | Male       | 32 (61.5)              | 5 (55.6)                               | 27 (62.8)                                  |                |
| Drugs                    | Ipi        | 24 (46.2)              | 8 (88.9)                               | 16 (37.2)                                  | 0.008          |
|                          | Niv        | 26 (50.0)              | 7 (77.8)                               | 19 (44.2)                                  | 0.140          |
|                          | Pem        | 23 (44.2)              | 5 (55.6)                               | 18 (41.9)                                  | 0.486          |
|                          | Ipi + Niv  | 1 (1.9)                | 0                                      | 1 (2.3)                                    | 1.000          |
| History of prior ICI use |            | 12 (23.1)              | 2 (22.2)                               | 10 (23.3)                                  | 1.000          |
| Treatment lines          | First line | 33 (63.5)              | 7 (77.8)                               | 26 (60.5)                                  | 0.458          |
|                          | ≥ Second   |                        |                                        |                                            |                |
|                          | line       |                        |                                        |                                            |                |
|                          |            | 19 (36.5)              | 2 (22.2)                               | 17 (39.5)                                  |                |

24 Data are mean ± SD or *n* (%).

25 **Abbreviations:** MM, malignant melanoma; irAE, immune-related adverse event; Ipi, ipilimumab; Niv,

26 nivolumab; Pem, pembrolizumab; ICIs, immune checkpoint inhibitors

27 **Supplementary Table S6. Number of patients and median OS in NSCLC and MM patients treated**  
 28 **with a single ICI.**

| Malignancy | Drugs | Number of patients (OS) |                     |                                | P value |
|------------|-------|-------------------------|---------------------|--------------------------------|---------|
|            |       | Total                   | With pituitary-irAE | Without pituitary-irAE         |         |
| NSCLC      | Niv   | <i>n</i> = 48           | <i>n</i> = 0 (NC)   | <i>n</i> = 48 (297, 199 - 395) | NC      |
|            | Pem   | <i>n</i> = 51           | <i>n</i> = 3 (NR)   | <i>n</i> = 48 (441, 266 - 616) | 0.089   |
| MM         | Ipi   | <i>n</i> = 6            | <i>n</i> = 0 (NC)   | <i>n</i> = 6 (156, 85 - 227)   | NC      |
|            | Niv   | <i>n</i> = 10           | <i>n</i> = 0 (NC)   | <i>n</i> = 10 (179, 80 - 278)  | NC      |
|            | Pem   | <i>n</i> = 15           | <i>n</i> = 1 (NR)   | <i>n</i> = 14 (NR)             | 0.424   |

29 Data are *n* or median (95% CI)

30 **Abbreviations:** OS, overall survival; NSCLC, non-small cell lung carcinoma; MM, malignant

31 melanoma; ICI, immune checkpoint inhibitor; Niv, nivolumab; Pem, pembrolizumab; Ate, atezolizumab;

32 Ipi, ipilimumab; irAE, immune-related adverse event; NC, not calculated (too few patients to calculate

33 reliably); NR, not reached

34

35

36 **Supplementary Table S7. Number of cycles for each drug and follow-up time for NSCLC patients**  
 37 **included in the Kaplan-Meier analysis according to pituitary-irAE development**

38

|                     |                                    | Total                            | With<br>pituitary-irAE             | Without<br>pituitary-irAE   | <i>P</i> value |
|---------------------|------------------------------------|----------------------------------|------------------------------------|-----------------------------|----------------|
| Number<br>of cycles | Niv                                | 9.3 ± 12.1                       | 15 ( <i>n</i> = 1)                 | 9.2 ± 12.2 ( <i>n</i> = 56) | NC             |
|                     | Pem                                | 6.7 ± 6.6                        | 10.0 ± 4.0 ( <i>n</i> = 3)         | 6.5 ± 6.7 ( <i>n</i> = 48)  | 0.382          |
|                     | Ate                                | 4.6 ± 8.2                        | 3 ( <i>n</i> = 1)                  | 4.5 ± 7.8 ( <i>n</i> = 8)   | NC             |
| Follow-up<br>days   | 304<br>(141 - 589, <i>n</i> = 108) | 698<br>(599 - 882, <i>n</i> = 4) | 293<br>(137 - 521, <i>n</i> = 104) | 0.013                       |                |

39 Data for number of cycles are mean ± SD (*n*). Data for follow-up time are median (IQR, *n*).

40 **Abbreviations:** NSCLC, non-small cell lung carcinoma; irAE, immune-related adverse event; Niv,

41 nivolumab; Pem, pembrolizumab; Ate, atezolizumab; NC, not calculated



42 **Supplementary Table S8. Number of cycles for each drug and follow-up time for MM patients**  
 43 **included in the Kaplan-Meier analysis according to pituitary-irAE development**

44

|                     |                                   | Total                           | With<br>pituitary-irAE           | Without<br>pituitary-irAE  | <i>P</i> value |
|---------------------|-----------------------------------|---------------------------------|----------------------------------|----------------------------|----------------|
| Number<br>of cycles | Ipi                               | 2.8 ± 1.2                       | 3.3 ± 1.2 ( <i>n</i> = 8)        | 2.6 ± 1.1 ( <i>n</i> = 16) | 0.224          |
|                     | Niv                               | 8.2 ± 5.6                       | 12.7 ± 2.3 ( <i>n</i> = 7)       | 6.6 ± 5.6 ( <i>n</i> = 19) | 0.010          |
|                     | Pem                               | 9.3 ± 7.0                       | 13.2 ± 6.9 ( <i>n</i> = 5)       | 8.2 ± 6.8 ( <i>n</i> = 18) | 0.164          |
|                     | Ipi + Niv                         | 1                               | NA ( <i>n</i> = 0)               | 1 ( <i>n</i> = 1)          | NC             |
| Follow-up<br>days   | 353<br>(132 - 575, <i>n</i> = 53) | 699<br>(556 - 962 <i>n</i> = 9) | 213<br>(105 - 491 <i>n</i> = 43) | 0.001                      |                |

45 Data for number of cycles are mean ± SD (*n*). Data for follow-up time are median (IQR, *n*)

46 **Abbreviations:** MM, malignant melanoma; Niv, nivolumab; Pem, pembrolizumab; NA, not available;

47 NC, not calculated

48 **Supplementary Table S9. Clinical characteristics of NSCLC patients included in the Kaplan-Meier**  
 49 **analysis according to development of thyroid-irAE**

| Characteristics          |               | Total<br><i>n</i> = 108 | With<br>thyroid-irAE<br><i>n</i> = 8 | Without<br>thyroid-irAE<br><i>n</i> = 100 | <i>P</i> value |
|--------------------------|---------------|-------------------------|--------------------------------------|-------------------------------------------|----------------|
| Age, y                   |               | 67 ± 10                 | 69 ± 9                               | 67 ± 11                                   | 0.562          |
| Sex                      | Female        | 29 (26.9)               | 4 (50.0)                             | 25 (25.0)                                 | 0.207          |
|                          | Male          | 79 (73.1)               | 4 (50.0)                             | 75 (75.0)                                 |                |
| Drugs                    | Niv           | 57 (52.8)               | 4 (50.0)                             | 53 (53.0)                                 | 1.000          |
|                          | Pem           | 51 (47.2)               | 4 (50.0)                             | 47 (47.0)                                 | 1.000          |
|                          | Ate           | 9 (8.3)                 | 1 (12.5)                             | 8 (8.0)                                   | 0.514          |
| History of prior ICI use |               | 0                       | 0                                    | 0                                         | 1.000          |
| Treatment lines          | First line    | 32 (29.6)               | 1 (12.5)                             | 31 (31.0)                                 | 0.432          |
|                          | ≥ Second line | 76 (70.4)               | 7 (87.5)                             | 69 (69.0)                                 |                |

50 Data are mean ± SD or *n* (%).

51 **Abbreviations:** NSCLC, non-small cell lung carcinoma; irAE, immune-related adverse event; Niv,

52 nivolumab; Pem, pembrolizumab; Ate, atezolizumab; ICIs, immune checkpoint inhibitors

53 **Supplementary Table S10. Clinical characteristics of MM patients included in the Kaplan-Meier**  
 54 **analysis according to development of thyroid-irAE**

| Characteristics          |               | Total<br><i>n</i> = 52 | With<br>thyroid-irAE<br><i>n</i> = 7 | Without<br>thyroid-irAE<br><i>n</i> = 45 | <i>P</i> value |
|--------------------------|---------------|------------------------|--------------------------------------|------------------------------------------|----------------|
| Age, y                   |               | 70 ± 12                | 70 ± 12                              | 71 ± 12                                  | 0.864          |
| Sex                      | Female        | 20 (38.5)              | 1 (14.3)                             | 19 (42.2)                                | 0.228          |
|                          | Male          | 32 (61.5)              | 6 (85.7)                             | 26 (57.8)                                |                |
| Drugs                    | Ipi           | 24 (46.2)              | 4 (57.1)                             | 20 (44.4)                                | 0.690          |
|                          | Niv           | 26 (50.0)              | 4 (57.1)                             | 22 (48.9)                                | 1.000          |
|                          | Pem           | 23 (44.2)              | 4 (57.1)                             | 19 (42.2)                                | 0.686          |
|                          | Ipi + Niv     | 1 (1.9)                | 0                                    | 1 (2.2)                                  | 1.000          |
| History of prior ICI use |               | 12 (23.1)              | 0                                    | 12 (26.7)                                | 0.181          |
| Treatment lines          | First line    | 33 (63.5)              | 6 (85.7)                             | 27 (60.0)                                | 0.242          |
|                          | ≥ Second line | 19 (36.5)              | 1 (14.3)                             | 18 (40.0)                                |                |

55

56 Data are mean ± SD or *n* (%).

57 **Abbreviations:** MM, malignant melanoma; irAE, immune-related adverse event; Ipi, ipilimumab; Niv,

58 nivolumab; Pem, pembrolizumab; ICIs, immune checkpoint inhibitors
